# Supplementary material for: Translational control plays a prominent role in the hepatocytic differentiation of HepaRG liver progenitor cells
Source: PubMed Central journal article supplement (PMC2395229; doi:10.1186/gb-2008-9-1-r19), 2008-01-25
Supplement: gb-2008-9-1-r19-S1.pdf [file gb-2008-9-1-r19-S1.pdf]

# Cell cycle

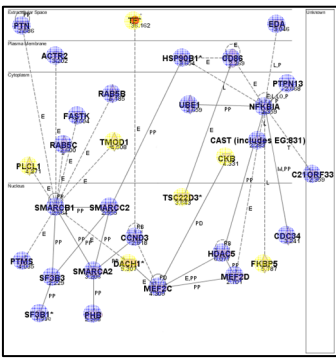

**A**

# Cell death

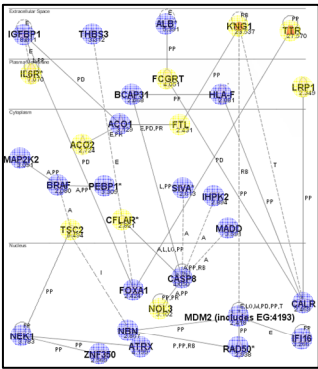

**B**

# Innate Immunity

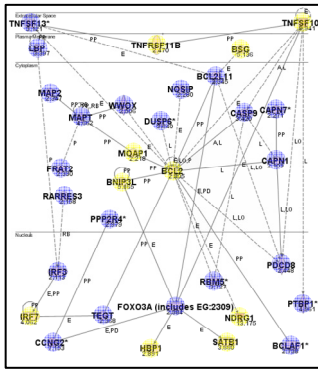

**C**

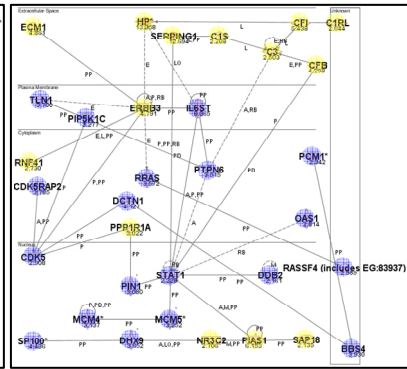

**D**

# Lipid metabolism + Drug metabolism

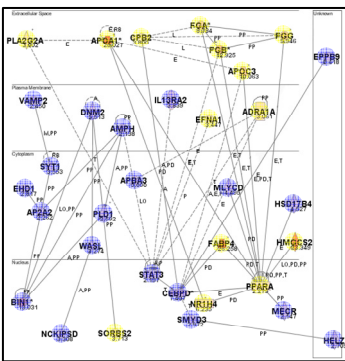

**E**

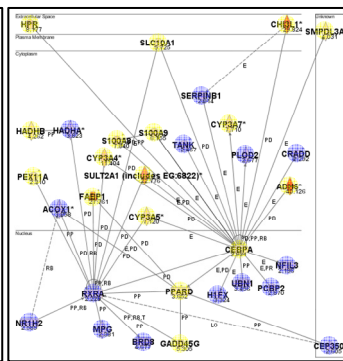

**F**

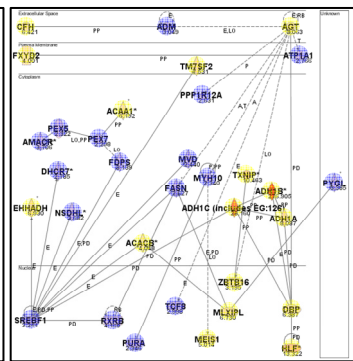

**G**

# Cell morphology

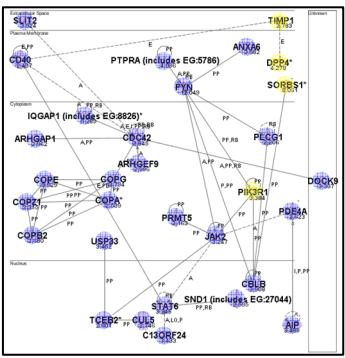

**H**

# Cell environment and Cell movement

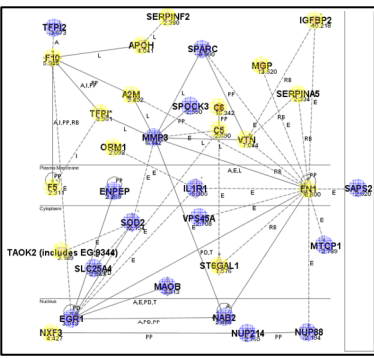

**I**

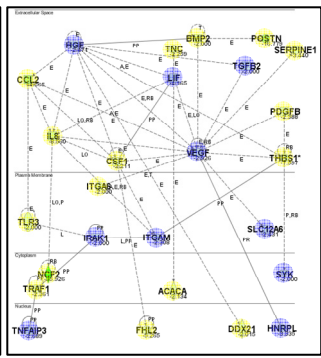

**J**
